# Supplementary material
Source: publisher figshare collection journal article supplement (https://acs.figshare.com/ndownloader/files/5090620)
Supplement: Supplementary file 1 [file 5090620]

  
data_cd24138 
  
_audit_creation_method            SHELXL-97 
_chemical_name_systematic 
; 
 ? 
; 
_chemical_name_common             ? 
_chemical_melting_point           ? 
_chemical_formula_moiety          ? 
_chemical_formula_sum 
 'C21 H22 N2 O6 S' 
_chemical_formula_weight          430.47 
  
loop_ 
 _atom_type_symbol 
 _atom_type_description 
 _atom_type_scat_dispersion_real 
 _atom_type_scat_dispersion_imag 
 _atom_type_scat_source 
 'C'  'C'   0.0033   0.0016 
 'International Tables Vol C Tables 4.2.6.8 and 6.1.1.4' 
 'H'  'H'   0.0000   0.0000 
 'International Tables Vol C Tables 4.2.6.8 and 6.1.1.4' 
 'N'  'N'   0.0061   0.0033 
 'International Tables Vol C Tables 4.2.6.8 and 6.1.1.4' 
 'O'  'O'   0.0106   0.0060 
 'International Tables Vol C Tables 4.2.6.8 and 6.1.1.4' 
 'S'  'S'   0.1246   0.1234 
 'International Tables Vol C Tables 4.2.6.8 and 6.1.1.4' 
  
_symmetry_cell_setting            Monoclinic 
_symmetry_space_group_name_H-M    P2(1)/n 
  
loop_ 
 _symmetry_equiv_pos_as_xyz 
 'x, y, z' 
 '-x+1/2, y+1/2, -z+1/2' 
 '-x, -y, -z' 
 'x-1/2, -y-1/2, z-1/2' 
  
_cell_length_a                    20.5357(16) 
_cell_length_b                    11.4427(9) 
_cell_length_c                    20.5964(15) 
_cell_angle_alpha                 90.00 
_cell_angle_beta                  117.564(2) 
_cell_angle_gamma                 90.00 
_cell_volume                      4290.5(6) 
_cell_formula_units_Z             8 
_cell_measurement_temperature     293(2) 
_cell_measurement_reflns_used     1586 
_cell_measurement_theta_min       4.462 
_cell_measurement_theta_max       39.510 
  
_exptl_crystal_description        ? 
_exptl_crystal_colour             colorless 
_exptl_crystal_size_max           0.368 
_exptl_crystal_size_mid           0.327 
_exptl_crystal_size_min           0.163 
_exptl_crystal_density_meas       ? 
_exptl_crystal_density_diffrn     1.333 
_exptl_crystal_density_method     'not measured' 
_exptl_crystal_F_000              1808 
_exptl_absorpt_coefficient_mu     0.190 
_exptl_absorpt_correction_type    empirical 
_exptl_absorpt_correction_T_min   0.51549 
_exptl_absorpt_correction_T_max   1.00000 
_exptl_absorpt_process_details    ? 
  
_exptl_special_details 
; 
 ? 
; 
  
_diffrn_ambient_temperature       293(2) 
_diffrn_radiation_wavelength      0.71073 
_diffrn_radiation_type            MoK\a 
_diffrn_radiation_source          'fine-focus sealed tube' 
_diffrn_radiation_monochromator   graphite 
_diffrn_measurement_device_type   'CCD area detector' 
_diffrn_measurement_method        'phi and omega scans' 
_diffrn_detector_area_resol_mean  ? 
_diffrn_standards_number          ? 
_diffrn_standards_interval_count  ? 
_diffrn_standards_interval_time   ? 
_diffrn_standards_decay_%         ? 
_diffrn_reflns_number             25789 
_diffrn_reflns_av_R_equivalents   0.0730 
_diffrn_reflns_av_sigmaI/netI     0.1489 
_diffrn_reflns_limit_h_min        -26 
_diffrn_reflns_limit_h_max        27 
_diffrn_reflns_limit_k_min        -14 
_diffrn_reflns_limit_k_max        14 
_diffrn_reflns_limit_l_min        -27 
_diffrn_reflns_limit_l_max        18 
_diffrn_reflns_theta_min          1.16 
_diffrn_reflns_theta_max          28.32 
_reflns_number_total              9877 
_reflns_number_gt                 3029 
_reflns_threshold_expression      >2sigma(I) 
  
_computing_data_collection        'Bruker SMART' 
_computing_cell_refinement        'Bruker SMART' 
_computing_data_reduction         'Bruker SHELXTL' 
_computing_structure_solution     'SHELXS-97 (Sheldrick, 1990)' 
_computing_structure_refinement   'SHELXL-97 (Sheldrick, 1997)' 
_computing_molecular_graphics     'Bruker SHELXTL' 
_computing_publication_material   'Bruker SHELXTL' 
  
_refine_special_details 
; 
 Refinement of F^2^ against ALL reflections.  The weighted R-factor wR and 
 goodness of fit S are based on F^2^, conventional R-factors R are based 
 on F, with F set to zero for negative F^2^. The threshold expression of 
 F^2^ > 2sigma(F^2^) is used only for calculating R-factors(gt) etc. and is 
 not relevant to the choice of reflections for refinement.  R-factors based 
 on F^2^ are statistically about twice as large as those based on F, and R- 
 factors based on ALL data will be even larger. 
; 
  
_refine_ls_structure_factor_coef  Fsqd 
_refine_ls_matrix_type            full 
_refine_ls_weighting_scheme       calc 
_refine_ls_weighting_details 
 'calc w=1/[\s^2^(Fo^2^)+(0.0788P)^2^+0.0000P] where P=(Fo^2^+2Fc^2^)/3' 
_atom_sites_solution_primary      direct 
_atom_sites_solution_secondary    difmap 
_atom_sites_solution_hydrogens    geom 
_refine_ls_hydrogen_treatment     mixed 
_refine_ls_extinction_method      none 
_refine_ls_extinction_coef        ? 
_refine_ls_number_reflns          9877 
_refine_ls_number_parameters      584 
_refine_ls_number_restraints      6 
_refine_ls_R_factor_all           0.1798 
_refine_ls_R_factor_gt            0.0632 
_refine_ls_wR_factor_ref          0.1880 
_refine_ls_wR_factor_gt           0.1559 
_refine_ls_goodness_of_fit_ref    0.740 
_refine_ls_restrained_S_all       0.845 
_refine_ls_shift/su_max           0.065 
_refine_ls_shift/su_mean          0.011 
  
loop_ 
 _atom_site_label 
 _atom_site_type_symbol 
 _atom_site_fract_x 
 _atom_site_fract_y 
 _atom_site_fract_z 
 _atom_site_U_iso_or_equiv 
 _atom_site_adp_type 
 _atom_site_occupancy 
 _atom_site_symmetry_multiplicity 
 _atom_site_calc_flag 
 _atom_site_refinement_flags 
 _atom_site_disorder_assembly 
 _atom_site_disorder_group 
S1 S 0.74465(7) 0.20720(11) 0.70423(6) 0.0576(4) Uani 1 1 d . . . 
S2 S 0.24176(7) 0.15212(10) 0.70470(6) 0.0537(4) Uani 1 1 d . . . 
N1 N 0.67120(18) 0.1639(3) 0.63142(17) 0.0490(9) Uani 1 1 d . . . 
N2 N 0.5862(3) -0.3856(5) 0.5955(3) 0.0849(15) Uani 1 1 d . . . 
N3 N 0.16774(18) 0.1066(3) 0.63346(17) 0.0471(9) Uani 1 1 d . . . 
N4 N 0.0819(3) -0.4432(5) 0.5963(3) 0.0885(16) Uani 1 1 d . . . 
O1 O 0.66683(19) 0.0179(3) 0.43613(17) 0.0802(11) Uani 1 1 d . . . 
O2 O 0.5841(2) 0.1555(4) 0.38163(19) 0.1100(15) Uani 1 1 d . . . 
O3 O 0.5450(2) -0.4015(4) 0.6225(3) 0.1105(16) Uani 1 1 d . . . 
O4 O 0.6077(3) -0.4630(4) 0.5697(3) 0.1245(18) Uani 1 1 d . . . 
O5 O 0.71843(17) 0.2599(3) 0.75067(15) 0.0735(10) Uani 1 1 d . . . 
O6 O 0.79332(17) 0.1093(3) 0.72843(16) 0.0735(10) Uani 1 1 d . . . 
O7 O 0.1609(2) -0.0369(3) 0.43573(18) 0.0840(11) Uani 1 1 d . . . 
O8 O 0.0740(2) 0.0960(3) 0.38169(19) 0.1073(15) Uani 1 1 d D . . 
O9 O 0.0429(3) -0.4599(4) 0.6251(3) 0.1283(19) Uani 1 1 d . . . 
O10 O 0.0999(3) -0.5193(4) 0.5662(3) 0.1290(18) Uani 1 1 d . . . 
O11 O 0.21707(17) 0.2061(3) 0.75184(15) 0.0685(9) Uani 1 1 d . . . 
O12 O 0.29049(16) 0.0541(3) 0.72917(16) 0.0678(9) Uani 1 1 d . . . 
C1 C 0.6149(3) 0.2552(4) 0.5914(3) 0.0543(12) Uani 1 1 d D . . 
C2 C 0.5990(2) 0.2331(4) 0.5148(2) 0.0516(12) Uani 1 1 d . . . 
H2 H 0.5685 0.2804 0.4758 0.062 Uiso 1 1 calc R . . 
C3 C 0.6320(2) 0.1405(4) 0.5075(2) 0.0456(11) Uani 1 1 d . . . 
C4 C 0.6797(3) 0.0816(4) 0.5806(2) 0.0484(12) Uani 1 1 d . . . 
C5 C 0.5475(4) 0.2473(7) 0.6029(4) 0.0770(17) Uani 1 1 d D . . 
C6 C 0.6298(3) 0.0957(4) 0.4391(3) 0.0590(13) Uani 1 1 d . . . 
C7 C 0.5828(5) 0.1268(7) 0.3096(4) 0.180(4) Uani 1 1 d D . . 
H7 H 0.5851 0.1977 0.2849 0.216 Uiso 1 1 calc R . . 
H8 H 0.6242 0.0776 0.3172 0.216 Uiso 1 1 calc R . . 
C8 C 0.5153(8) 0.0669(13) 0.2673(9) 0.401(12) Uiso 1 1 d D . . 
H9 H 0.5081 0.0092 0.2972 0.601 Uiso 1 1 calc R . . 
H10 H 0.5170 0.0293 0.2264 0.601 Uiso 1 1 calc R . . 
H11 H 0.4755 0.1218 0.2497 0.601 Uiso 1 1 calc R . . 
C9 C 0.6563(2) -0.0425(4) 0.5874(2) 0.0467(11) Uani 1 1 d . . . 
C10 C 0.6833(2) -0.1356(4) 0.5639(2) 0.0598(13) Uani 1 1 d . . . 
H12 H 0.7166 -0.1221 0.5459 0.072 Uiso 1 1 calc R . . 
C11 C 0.6608(3) -0.2482(5) 0.5672(3) 0.0679(15) Uani 1 1 d . . . 
C12 C 0.6123(3) -0.2657(4) 0.5943(3) 0.0601(13) Uani 1 1 d . . . 
C13 C 0.5861(3) -0.1772(5) 0.6189(2) 0.0636(13) Uani 1 1 d . . . 
H14 H 0.5535 -0.1919 0.6376 0.076 Uiso 1 1 calc R . . 
C14 C 0.6086(3) -0.0642(5) 0.6159(3) 0.0581(13) Uani 1 1 d . . . 
C15 C 0.7845(2) 0.3175(4) 0.6755(2) 0.0511(12) Uani 1 1 d . . . 
C16 C 0.7736(3) 0.4329(5) 0.6867(3) 0.0565(13) Uani 1 1 d . . . 
C17 C 0.8008(3) 0.5196(4) 0.6594(3) 0.0694(14) Uani 1 1 d . . . 
H17 H 0.7928 0.5973 0.6669 0.083 Uiso 1 1 calc R . . 
C18 C 0.8394(3) 0.4944(5) 0.6213(3) 0.0683(14) Uani 1 1 d . . . 
C19 C 0.8523(3) 0.3785(5) 0.6140(3) 0.0756(17) Uani 1 1 d . . . 
C20 C 0.8252(3) 0.2890(4) 0.6407(3) 0.0663(14) Uani 1 1 d . . . 
H19 H 0.8346 0.2112 0.6349 0.080 Uiso 1 1 calc R . . 
C21 C 0.8664(3) 0.5905(5) 0.5894(3) 0.111(2) Uani 1 1 d . . . 
H21 H 0.8857 0.6535 0.6239 0.167 Uiso 1 1 calc R . . 
H20 H 0.8263 0.6185 0.5449 0.167 Uiso 1 1 calc R . . 
H22 H 0.9043 0.5604 0.5791 0.167 Uiso 1 1 calc R . . 
C22 C 0.1105(3) 0.1964(5) 0.5941(3) 0.0560(13) Uani 1 1 d . . . 
C23 C 0.0933(2) 0.1739(4) 0.5166(2) 0.0556(12) Uani 1 1 d . . . 
H24 H 0.0621 0.2209 0.4778 0.067 Uiso 1 1 calc R . . 
C24 C 0.1263(2) 0.0816(4) 0.5083(2) 0.0481(11) Uani 1 1 d . . . 
C25 C 0.1756(2) 0.0249(4) 0.5814(2) 0.0458(11) Uani 1 1 d D . . 
C26 C 0.0444(3) 0.1872(5) 0.6086(3) 0.0848(17) Uani 1 1 d . . . 
H27 H 0.0107 0.2495 0.5838 0.127 Uiso 1 1 calc R . . 
H26 H 0.0604 0.1929 0.6603 0.127 Uiso 1 1 calc R . . 
H28 H 0.0204 0.1135 0.5909 0.127 Uiso 1 1 calc R . . 
C27 C 0.1226(3) 0.0390(5) 0.4394(3) 0.0585(13) Uani 1 1 d . . . 
C28 C 0.0831(5) 0.0740(8) 0.3117(4) 0.203(5) Uani 1 1 d D . . 
H29 H 0.1037 0.1419 0.2996 0.244 Uiso 1 1 calc R . . 
H30 H 0.1144 0.0069 0.3179 0.244 Uiso 1 1 calc R . . 
C29 C 0.0112(7) 0.0529(12) 0.2580(8) 0.350(9) Uiso 1 1 d D . . 
H33 H -0.0028 -0.0253 0.2631 0.524 Uiso 1 1 calc R . . 
H32 H 0.0082 0.0621 0.2104 0.524 Uiso 1 1 calc R . . 
H31 H -0.0214 0.1075 0.2636 0.524 Uiso 1 1 calc R . . 
C30 C 0.1532(2) -0.0991(4) 0.5897(2) 0.0458(11) Uani 1 1 d . . . 
C31 C 0.1762(3) -0.1930(5) 0.5620(2) 0.0640(14) Uani 1 1 d . . . 
H34 H 0.2071 -0.1790 0.5411 0.077 Uiso 1 1 calc R . . 
C32 C 0.1545(3) -0.3044(5) 0.5648(3) 0.0666(14) Uani 1 1 d . . . 
H35 H 0.1702 -0.3662 0.5463 0.080 Uiso 1 1 calc R . . 
C33 C 0.1091(3) -0.3234(5) 0.5956(3) 0.0619(14) Uani 1 1 d . . . 
C34 C 0.0872(2) -0.2349(5) 0.6255(2) 0.0613(13) Uani 1 1 d . . . 
H36 H 0.0578 -0.2503 0.6478 0.074 Uiso 1 1 calc R . . 
C35 C 0.1092(2) -0.1231(4) 0.6221(2) 0.0558(13) Uani 1 1 d . . . 
H37 H 0.0942 -0.0624 0.6420 0.067 Uiso 1 1 calc R . . 
C36 C 0.2811(2) 0.2618(4) 0.6741(2) 0.0487(11) Uani 1 1 d . . . 
C37 C 0.2692(2) 0.3773(5) 0.6829(2) 0.0600(13) Uani 1 1 d . . . 
H38 H 0.2426 0.3983 0.7074 0.072 Uiso 1 1 calc R . . 
C38 C 0.2972(3) 0.4622(5) 0.6550(3) 0.0670(15) Uani 1 1 d . . . 
C39 C 0.3372(3) 0.4353(5) 0.6189(3) 0.0728(15) Uani 1 1 d . . . 
C40 C 0.3498(3) 0.3180(5) 0.6127(3) 0.0804(17) Uani 1 1 d . . . 
H40 H 0.3772 0.2970 0.5890 0.096 Uiso 1 1 calc R . . 
C41 C 0.3229(3) 0.2308(4) 0.6407(3) 0.0663(14) Uani 1 1 d . . . 
H41 H 0.3331 0.1526 0.6368 0.080 Uiso 1 1 calc R . . 
C42 C 0.3649(3) 0.5283(5) 0.5863(3) 0.108(2) Uani 1 1 d . . . 
H42 H 0.3276 0.5461 0.5376 0.162 Uiso 1 1 calc R . . 
H44 H 0.4081 0.5008 0.5844 0.162 Uiso 1 1 calc R . . 
H43 H 0.3765 0.5975 0.6160 0.162 Uiso 1 1 calc R . . 
H1 H 0.638(2) 0.329(2) 0.614(2) 0.067(14) Uiso 1 1 d D . . 
H3 H 0.728(2) 0.079(3) 0.590(2) 0.056(14) Uiso 1 1 d . . . 
H4 H 0.563(2) 0.244(4) 0.655(2) 0.074(16) Uiso 1 1 d . . . 
H5 H 0.523(2) 0.322(4) 0.589(2) 0.077(17) Uiso 1 1 d . . . 
H6 H 0.523(2) 0.177(3) 0.585(2) 0.08(2) Uiso 1 1 d D . . 
H13 H 0.678(2) -0.317(4) 0.554(2) 0.065(14) Uiso 1 1 d . . . 
H15 H 0.594(2) -0.001(4) 0.637(2) 0.065(14) Uiso 1 1 d . . . 
H16 H 0.744(2) 0.451(4) 0.711(2) 0.081(16) Uiso 1 1 d . . . 
H18 H 0.880(2) 0.361(3) 0.589(2) 0.056(13) Uiso 1 1 d . . . 
H23 H 0.128(2) 0.271(3) 0.6068(19) 0.047(13) Uiso 1 1 d . . . 
H25 H 0.2276(12) 0.025(3) 0.5922(18) 0.049(12) Uiso 1 1 d D . . 
H39 H 0.287(2) 0.541(4) 0.659(2) 0.070(16) Uiso 1 1 d . . . 
  
loop_ 
 _atom_site_aniso_label 
 _atom_site_aniso_U_11 
 _atom_site_aniso_U_22 
 _atom_site_aniso_U_33 
 _atom_site_aniso_U_23 
 _atom_site_aniso_U_13 
 _atom_site_aniso_U_12 
S1 0.0679(9) 0.0557(9) 0.0425(7) 0.0009(6) 0.0199(7) -0.0064(7) 
S2 0.0620(8) 0.0527(9) 0.0418(7) 0.0014(6) 0.0202(6) -0.0055(7) 
N1 0.056(2) 0.041(2) 0.047(2) -0.0053(18) 0.021(2) -0.0028(18) 
N2 0.069(4) 0.054(4) 0.096(4) 0.017(3) 0.008(3) -0.003(3) 
N3 0.047(2) 0.046(2) 0.045(2) -0.0016(18) 0.0190(19) 0.0021(18) 
N4 0.080(4) 0.057(4) 0.097(4) 0.011(3) 0.014(3) -0.007(3) 
O1 0.098(3) 0.082(3) 0.068(2) 0.0043(19) 0.045(2) 0.029(2) 
O2 0.153(4) 0.130(4) 0.053(2) 0.023(2) 0.053(3) 0.075(3) 
O3 0.087(3) 0.079(3) 0.159(4) 0.035(3) 0.052(3) -0.013(2) 
O4 0.154(4) 0.041(3) 0.177(5) -0.002(3) 0.075(4) -0.005(3) 
O5 0.101(3) 0.081(3) 0.0449(19) -0.0117(17) 0.0387(19) -0.017(2) 
O6 0.072(2) 0.060(2) 0.065(2) 0.0139(17) 0.0115(18) 0.0031(19) 
O7 0.101(3) 0.092(3) 0.071(3) 0.005(2) 0.049(2) 0.026(2) 
O8 0.155(4) 0.117(3) 0.046(2) 0.017(2) 0.043(3) 0.062(3) 
O9 0.120(4) 0.088(4) 0.182(5) 0.020(3) 0.074(4) -0.033(3) 
O10 0.161(5) 0.051(3) 0.175(5) 0.004(3) 0.077(4) 0.002(3) 
O11 0.090(2) 0.078(2) 0.0462(19) -0.0089(16) 0.0382(18) -0.0101(19) 
O12 0.067(2) 0.058(2) 0.060(2) 0.0159(16) 0.0134(17) 0.0038(18) 
C1 0.059(3) 0.045(3) 0.059(3) -0.005(3) 0.027(3) 0.005(3) 
C2 0.053(3) 0.048(3) 0.054(3) 0.013(2) 0.025(2) 0.006(2) 
C3 0.048(3) 0.046(3) 0.049(3) 0.004(2) 0.027(2) 0.005(2) 
C4 0.047(3) 0.049(3) 0.049(3) -0.002(2) 0.022(3) -0.001(2) 
C5 0.079(5) 0.089(6) 0.074(5) -0.001(4) 0.045(4) 0.013(4) 
C6 0.065(3) 0.058(4) 0.056(3) 0.009(3) 0.029(3) 0.020(3) 
C7 0.272(11) 0.204(9) 0.108(6) 0.026(6) 0.125(7) 0.129(9) 
C9 0.051(3) 0.045(3) 0.038(3) 0.001(2) 0.016(2) 0.001(2) 
C10 0.069(3) 0.048(3) 0.070(3) 0.009(3) 0.039(3) 0.010(3) 
C11 0.077(4) 0.037(4) 0.079(4) 0.006(3) 0.028(3) 0.011(3) 
C12 0.057(3) 0.043(3) 0.061(3) 0.013(3) 0.011(3) -0.004(3) 
C13 0.061(3) 0.056(4) 0.075(4) 0.007(3) 0.032(3) -0.004(3) 
C14 0.066(4) 0.050(4) 0.064(3) -0.001(3) 0.036(3) -0.003(3) 
C15 0.053(3) 0.051(3) 0.045(3) -0.009(2) 0.018(2) -0.006(2) 
C16 0.065(3) 0.051(4) 0.057(3) -0.010(3) 0.031(3) -0.009(3) 
C17 0.079(4) 0.051(4) 0.080(4) -0.010(3) 0.039(3) -0.003(3) 
C18 0.076(4) 0.060(4) 0.071(4) -0.008(3) 0.036(3) -0.018(3) 
C19 0.085(4) 0.077(5) 0.085(4) -0.019(3) 0.056(4) -0.013(3) 
C20 0.074(4) 0.051(4) 0.082(4) -0.011(3) 0.043(3) -0.008(3) 
C21 0.120(5) 0.093(5) 0.143(6) 0.004(4) 0.080(5) -0.028(4) 
C22 0.057(3) 0.051(4) 0.058(3) -0.002(3) 0.024(3) 0.002(3) 
C23 0.054(3) 0.055(3) 0.053(3) 0.006(2) 0.021(3) 0.003(3) 
C24 0.048(3) 0.051(3) 0.047(3) 0.003(2) 0.024(2) 0.000(2) 
C25 0.046(3) 0.045(3) 0.046(3) 0.000(2) 0.021(2) -0.001(2) 
C26 0.072(4) 0.105(5) 0.094(4) 0.004(3) 0.052(3) 0.020(3) 
C27 0.071(4) 0.060(4) 0.048(3) 0.001(3) 0.031(3) -0.001(3) 
C28 0.268(11) 0.214(10) 0.084(6) -0.017(6) 0.044(7) 0.149(8) 
C30 0.044(3) 0.045(3) 0.039(3) 0.002(2) 0.011(2) 0.003(2) 
C31 0.075(4) 0.055(4) 0.069(3) 0.011(3) 0.039(3) 0.015(3) 
C32 0.081(4) 0.044(3) 0.069(3) 0.003(3) 0.030(3) 0.013(3) 
C33 0.054(3) 0.048(4) 0.061(3) 0.014(3) 0.007(3) 0.000(3) 
C34 0.052(3) 0.058(4) 0.071(3) 0.009(3) 0.026(3) -0.002(3) 
C35 0.055(3) 0.055(4) 0.057(3) 0.003(2) 0.026(3) -0.001(3) 
C36 0.052(3) 0.050(3) 0.040(3) -0.005(2) 0.018(2) -0.005(2) 
C37 0.068(3) 0.058(4) 0.062(3) -0.005(3) 0.037(3) -0.002(3) 
C38 0.077(4) 0.049(4) 0.075(4) -0.007(3) 0.035(3) -0.006(3) 
C39 0.082(4) 0.060(4) 0.081(4) -0.010(3) 0.042(3) -0.014(3) 
C40 0.088(4) 0.084(5) 0.092(4) -0.022(4) 0.061(4) -0.018(4) 
C41 0.073(4) 0.054(4) 0.084(4) -0.013(3) 0.047(3) -0.011(3) 
C42 0.136(5) 0.086(5) 0.130(5) -0.005(4) 0.086(5) -0.042(4) 
  
_geom_special_details 
; 
 All esds (except the esd in the dihedral angle between two l.s. planes) 
 are estimated using the full covariance matrix.  The cell esds are taken 
 into account individually in the estimation of esds in distances, angles 
 and torsion angles; correlations between esds in cell parameters are only 
 used when they are defined by crystal symmetry.  An approximate (isotropic) 
 treatment of cell esds is used for estimating esds involving l.s. planes. 
; 
  
loop_ 
 _geom_bond_atom_site_label_1 
 _geom_bond_atom_site_label_2 
 _geom_bond_distance 
 _geom_bond_site_symmetry_2 
 _geom_bond_publ_flag 
S1 O6 1.429(3) . ? 
S1 O5 1.430(3) . ? 
S1 N1 1.636(3) . ? 
S1 C15 1.749(5) . ? 
S2 O11 1.427(3) . ? 
S2 O12 1.431(3) . ? 
S2 N3 1.634(3) . ? 
S2 C36 1.759(4) . ? 
N1 C4 1.477(5) . ? 
N1 C1 1.491(5) . ? 
N2 O4 1.217(6) . ? 
N2 O3 1.221(5) . ? 
N2 C12 1.477(6) . ? 
N3 C25 1.486(5) . ? 
N3 C22 1.487(5) . ? 
N4 O9 1.213(6) . ? 
N4 O10 1.221(6) . ? 
N4 C33 1.482(6) . ? 
O1 C6 1.191(5) . ? 
O2 C6 1.312(5) . ? 
O2 C7 1.509(6) . ? 
O7 C27 1.197(5) . ? 
O8 C27 1.318(5) . ? 
O8 C28 1.558(7) . ? 
C1 C2 1.477(6) . ? 
C1 C5 1.511(7) . ? 
C1 H1 0.97(2) . ? 
C2 C3 1.305(5) . ? 
C2 H2 0.9300 . ? 
C3 C6 1.479(6) . ? 
C3 C4 1.521(6) . ? 
C4 C9 1.527(6) . ? 
C4 H3 0.91(4) . ? 
C5 H4 0.97(4) . ? 
C5 H5 0.97(4) . ? 
C5 H6 0.94(2) . ? 
C7 C8 1.425(14) . ? 
C7 H7 0.9700 . ? 
C7 H8 0.9700 . ? 
C8 H9 0.9600 . ? 
C8 H10 0.9600 . ? 
C8 H11 0.9600 . ? 
C9 C14 1.377(6) . ? 
C9 C10 1.387(5) . ? 
C10 C11 1.381(6) . ? 
C10 H12 0.9300 . ? 
C11 C12 1.365(7) . ? 
C11 H13 0.96(4) . ? 
C12 C13 1.350(6) . ? 
C13 C14 1.384(6) . ? 
C13 H14 0.9300 . ? 
C14 H15 0.96(4) . ? 
C15 C20 1.370(5) . ? 
C15 C16 1.376(6) . ? 
C16 C17 1.380(6) . ? 
C16 H16 0.96(4) . ? 
C17 C18 1.380(6) . ? 
C17 H17 0.9300 . ? 
C18 C19 1.373(7) . ? 
C18 C21 1.512(6) . ? 
C19 C20 1.394(6) . ? 
C19 H18 0.94(4) . ? 
C20 H19 0.9300 . ? 
C21 H21 0.9600 . ? 
C21 H20 0.9600 . ? 
C21 H22 0.9600 . ? 
C22 C23 1.489(6) . ? 
C22 C26 1.523(6) . ? 
C22 H23 0.91(4) . ? 
C23 C24 1.308(5) . ? 
C23 H24 0.9300 . ? 
C24 C27 1.469(6) . ? 
C24 C25 1.518(6) . ? 
C25 C30 1.526(6) . ? 
C25 H25 0.986(19) . ? 
C26 H27 0.9600 . ? 
C26 H26 0.9600 . ? 
C26 H28 0.9600 . ? 
C28 C29 1.398(12) . ? 
C28 H29 0.9700 . ? 
C28 H30 0.9700 . ? 
C29 H33 0.9600 . ? 
C29 H32 0.9600 . ? 
C29 H31 0.9600 . ? 
C30 C35 1.377(5) . ? 
C30 C31 1.397(6) . ? 
C31 C32 1.361(6) . ? 
C31 H34 0.9300 . ? 
C32 C33 1.366(6) . ? 
C32 H35 0.9300 . ? 
C33 C34 1.364(6) . ? 
C34 C35 1.369(6) . ? 
C34 H36 0.9300 . ? 
C35 H37 0.9300 . ? 
C36 C37 1.371(6) . ? 
C36 C41 1.374(5) . ? 
C37 C38 1.381(6) . ? 
C37 H38 0.9300 . ? 
C38 C39 1.374(7) . ? 
C38 H39 0.94(4) . ? 
C39 C40 1.384(7) . ? 
C39 C42 1.504(6) . ? 
C40 C41 1.389(6) . ? 
C40 H40 0.9300 . ? 
C41 H41 0.9300 . ? 
C42 H42 0.9600 . ? 
C42 H44 0.9600 . ? 
C42 H43 0.9600 . ? 
  
loop_ 
 _geom_angle_atom_site_label_1 
 _geom_angle_atom_site_label_2 
 _geom_angle_atom_site_label_3 
 _geom_angle 
 _geom_angle_site_symmetry_1 
 _geom_angle_site_symmetry_3 
 _geom_angle_publ_flag 
O6 S1 O5 121.1(2) . . ? 
O6 S1 N1 106.36(19) . . ? 
O5 S1 N1 105.55(19) . . ? 
O6 S1 C15 108.8(2) . . ? 
O5 S1 C15 107.6(2) . . ? 
N1 S1 C15 106.59(18) . . ? 
O11 S2 O12 120.70(19) . . ? 
O11 S2 N3 105.85(18) . . ? 
O12 S2 N3 105.96(19) . . ? 
O11 S2 C36 107.5(2) . . ? 
O12 S2 C36 108.9(2) . . ? 
N3 S2 C36 107.21(18) . . ? 
C4 N1 C1 111.7(3) . . ? 
C4 N1 S1 118.8(3) . . ? 
C1 N1 S1 116.4(3) . . ? 
O4 N2 O3 123.9(6) . . ? 
O4 N2 C12 117.4(6) . . ? 
O3 N2 C12 118.6(6) . . ? 
C25 N3 C22 111.3(3) . . ? 
C25 N3 S2 118.8(3) . . ? 
C22 N3 S2 116.2(3) . . ? 
O9 N4 O10 124.0(6) . . ? 
O9 N4 C33 119.1(6) . . ? 
O10 N4 C33 116.8(6) . . ? 
C6 O2 C7 117.0(4) . . ? 
C27 O8 C28 112.9(4) . . ? 
C2 C1 N1 101.7(3) . . ? 
C2 C1 C5 113.0(4) . . ? 
N1 C1 C5 113.8(5) . . ? 
C2 C1 H1 118(2) . . ? 
N1 C1 H1 105(2) . . ? 
C5 C1 H1 105(2) . . ? 
C3 C2 C1 113.1(4) . . ? 
C3 C2 H2 123.4 . . ? 
C1 C2 H2 123.4 . . ? 
C2 C3 C6 127.1(4) . . ? 
C2 C3 C4 112.1(4) . . ? 
C6 C3 C4 120.8(4) . . ? 
N1 C4 C3 100.8(4) . . ? 
N1 C4 C9 112.5(4) . . ? 
C3 C4 C9 114.7(4) . . ? 
N1 C4 H3 110(2) . . ? 
C3 C4 H3 112(2) . . ? 
C9 C4 H3 107(2) . . ? 
C1 C5 H4 109(3) . . ? 
C1 C5 H5 107(3) . . ? 
H4 C5 H5 102(4) . . ? 
C1 C5 H6 111(3) . . ? 
H4 C5 H6 104(4) . . ? 
H5 C5 H6 123(4) . . ? 
O1 C6 O2 123.4(5) . . ? 
O1 C6 C3 124.6(4) . . ? 
O2 C6 C3 111.9(4) . . ? 
C8 C7 O2 106.0(10) . . ? 
C8 C7 H7 110.5 . . ? 
O2 C7 H7 110.5 . . ? 
C8 C7 H8 110.5 . . ? 
O2 C7 H8 110.5 . . ? 
H7 C7 H8 108.7 . . ? 
C7 C8 H9 109.4 . . ? 
C7 C8 H10 109.5 . . ? 
H9 C8 H10 109.5 . . ? 
C7 C8 H11 109.5 . . ? 
H9 C8 H11 109.5 . . ? 
H10 C8 H11 109.5 . . ? 
C14 C9 C10 119.2(5) . . ? 
C14 C9 C4 121.5(4) . . ? 
C10 C9 C4 119.3(4) . . ? 
C11 C10 C9 120.3(5) . . ? 
C11 C10 H12 119.9 . . ? 
C9 C10 H12 119.9 . . ? 
C12 C11 C10 118.6(5) . . ? 
C12 C11 H13 115(3) . . ? 
C10 C11 H13 126(3) . . ? 
C13 C12 C11 122.5(5) . . ? 
C13 C12 N2 118.7(5) . . ? 
C11 C12 N2 118.8(5) . . ? 
C12 C13 C14 119.0(5) . . ? 
C12 C13 H14 120.5 . . ? 
C14 C13 H14 120.5 . . ? 
C9 C14 C13 120.3(5) . . ? 
C9 C14 H15 119(3) . . ? 
C13 C14 H15 120(3) . . ? 
C20 C15 C16 120.2(4) . . ? 
C20 C15 S1 120.0(4) . . ? 
C16 C15 S1 119.8(4) . . ? 
C15 C16 C17 119.5(5) . . ? 
C15 C16 H16 119(3) . . ? 
C17 C16 H16 122(3) . . ? 
C16 C17 C18 122.0(5) . . ? 
C16 C17 H17 119.0 . . ? 
C18 C17 H17 119.0 . . ? 
C19 C18 C17 117.0(5) . . ? 
C19 C18 C21 121.8(5) . . ? 
C17 C18 C21 121.2(5) . . ? 
C18 C19 C20 122.3(5) . . ? 
C18 C19 H18 118(3) . . ? 
C20 C19 H18 120(3) . . ? 
C15 C20 C19 118.9(5) . . ? 
C15 C20 H19 120.6 . . ? 
C19 C20 H19 120.6 . . ? 
C18 C21 H21 109.5 . . ? 
C18 C21 H20 109.5 . . ? 
H21 C21 H20 109.5 . . ? 
C18 C21 H22 109.5 . . ? 
H21 C21 H22 109.5 . . ? 
H20 C21 H22 109.5 . . ? 
N3 C22 C23 101.5(4) . . ? 
N3 C22 C26 113.4(4) . . ? 
C23 C22 C26 114.0(4) . . ? 
N3 C22 H23 112(2) . . ? 
C23 C22 H23 109(2) . . ? 
C26 C22 H23 106(2) . . ? 
C24 C23 C22 113.6(4) . . ? 
C24 C23 H24 123.2 . . ? 
C22 C23 H24 123.2 . . ? 
C23 C24 C27 126.7(4) . . ? 
C23 C24 C25 111.3(4) . . ? 
C27 C24 C25 122.0(4) . . ? 
N3 C25 C24 101.6(3) . . ? 
N3 C25 C30 111.5(3) . . ? 
C24 C25 C30 114.3(4) . . ? 
N3 C25 H25 108(2) . . ? 
C24 C25 H25 112(2) . . ? 
C30 C25 H25 109(2) . . ? 
C22 C26 H27 109.5 . . ? 
C22 C26 H26 109.5 . . ? 
H27 C26 H26 109.5 . . ? 
C22 C26 H28 109.5 . . ? 
H27 C26 H28 109.5 . . ? 
H26 C26 H28 109.5 . . ? 
O7 C27 O8 123.3(5) . . ? 
O7 C27 C24 124.1(5) . . ? 
O8 C27 C24 112.6(5) . . ? 
C29 C28 O8 103.0(10) . . ? 
C29 C28 H29 111.1 . . ? 
O8 C28 H29 111.2 . . ? 
C29 C28 H30 111.3 . . ? 
O8 C28 H30 111.2 . . ? 
H29 C28 H30 109.1 . . ? 
C28 C29 H33 109.3 . . ? 
C28 C29 H32 109.5 . . ? 
H33 C29 H32 109.5 . . ? 
C28 C29 H31 109.5 . . ? 
H33 C29 H31 109.5 . . ? 
H32 C29 H31 109.5 . . ? 
C35 C30 C31 117.8(4) . . ? 
C35 C30 C25 122.6(4) . . ? 
C31 C30 C25 119.6(4) . . ? 
C32 C31 C30 121.5(5) . . ? 
C32 C31 H34 119.2 . . ? 
C30 C31 H34 119.2 . . ? 
C31 C32 C33 118.5(5) . . ? 
C31 C32 H35 120.8 . . ? 
C33 C32 H35 120.8 . . ? 
C34 C33 C32 121.9(5) . . ? 
C34 C33 N4 118.6(5) . . ? 
C32 C33 N4 119.5(5) . . ? 
C33 C34 C35 119.0(5) . . ? 
C33 C34 H36 120.5 . . ? 
C35 C34 H36 120.5 . . ? 
C34 C35 C30 121.2(5) . . ? 
C34 C35 H37 119.4 . . ? 
C30 C35 H37 119.4 . . ? 
C37 C36 C41 120.4(4) . . ? 
C37 C36 S2 120.1(4) . . ? 
C41 C36 S2 119.5(4) . . ? 
C36 C37 C38 119.3(5) . . ? 
C36 C37 H38 120.4 . . ? 
C38 C37 H38 120.4 . . ? 
C39 C38 C37 122.4(5) . . ? 
C39 C38 H39 119(3) . . ? 
C37 C38 H39 119(3) . . ? 
C38 C39 C40 116.9(5) . . ? 
C38 C39 C42 121.8(5) . . ? 
C40 C39 C42 121.3(5) . . ? 
C39 C40 C41 122.1(5) . . ? 
C39 C40 H40 119.0 . . ? 
C41 C40 H40 119.0 . . ? 
C36 C41 C40 118.9(5) . . ? 
C36 C41 H41 120.5 . . ? 
C40 C41 H41 120.5 . . ? 
C39 C42 H42 109.5 . . ? 
C39 C42 H44 109.5 . . ? 
H42 C42 H44 109.5 . . ? 
C39 C42 H43 109.5 . . ? 
H42 C42 H43 109.5 . . ? 
H44 C42 H43 109.5 . . ? 
  
loop_ 
 _geom_torsion_atom_site_label_1 
 _geom_torsion_atom_site_label_2 
 _geom_torsion_atom_site_label_3 
 _geom_torsion_atom_site_label_4 
 _geom_torsion 
 _geom_torsion_site_symmetry_1 
 _geom_torsion_site_symmetry_2 
 _geom_torsion_site_symmetry_3 
 _geom_torsion_site_symmetry_4 
 _geom_torsion_publ_flag 
O6 S1 N1 C4 -35.9(4) . . . . ? 
O5 S1 N1 C4 -165.7(3) . . . . ? 
C15 S1 N1 C4 80.1(4) . . . . ? 
O6 S1 N1 C1 -174.0(3) . . . . ? 
O5 S1 N1 C1 56.2(3) . . . . ? 
C15 S1 N1 C1 -58.0(3) . . . . ? 
O11 S2 N3 C25 -167.4(3) . . . . ? 
O12 S2 N3 C25 -38.1(3) . . . . ? 
C36 S2 N3 C25 78.1(3) . . . . ? 
O11 S2 N3 C22 55.5(3) . . . . ? 
O12 S2 N3 C22 -175.2(3) . . . . ? 
C36 S2 N3 C22 -59.0(3) . . . . ? 
C4 N1 C1 C2 -8.2(5) . . . . ? 
S1 N1 C1 C2 132.8(3) . . . . ? 
C4 N1 C1 C5 113.6(5) . . . . ? 
S1 N1 C1 C5 -105.4(5) . . . . ? 
N1 C1 C2 C3 5.7(5) . . . . ? 
C5 C1 C2 C3 -116.7(5) . . . . ? 
C1 C2 C3 C6 -178.1(4) . . . . ? 
C1 C2 C3 C4 -1.3(5) . . . . ? 
C1 N1 C4 C3 7.5(4) . . . . ? 
S1 N1 C4 C3 -132.4(3) . . . . ? 
C1 N1 C4 C9 -115.1(4) . . . . ? 
S1 N1 C4 C9 105.0(4) . . . . ? 
C2 C3 C4 N1 -3.8(5) . . . . ? 
C6 C3 C4 N1 173.2(4) . . . . ? 
C2 C3 C4 C9 117.2(4) . . . . ? 
C6 C3 C4 C9 -65.7(6) . . . . ? 
C7 O2 C6 O1 -3.7(9) . . . . ? 
C7 O2 C6 C3 173.6(6) . . . . ? 
C2 C3 C6 O1 171.8(5) . . . . ? 
C4 C3 C6 O1 -4.7(8) . . . . ? 
C2 C3 C6 O2 -5.4(7) . . . . ? 
C4 C3 C6 O2 178.0(4) . . . . ? 
C6 O2 C7 C8 107.9(10) . . . . ? 
N1 C4 C9 C14 22.5(6) . . . . ? 
C3 C4 C9 C14 -91.9(5) . . . . ? 
N1 C4 C9 C10 -157.9(4) . . . . ? 
C3 C4 C9 C10 87.7(5) . . . . ? 
C14 C9 C10 C11 1.9(7) . . . . ? 
C4 C9 C10 C11 -177.7(4) . . . . ? 
C9 C10 C11 C12 -0.5(7) . . . . ? 
C10 C11 C12 C13 -0.8(8) . . . . ? 
C10 C11 C12 N2 177.9(4) . . . . ? 
O4 N2 C12 C13 176.4(5) . . . . ? 
O3 N2 C12 C13 -4.0(7) . . . . ? 
O4 N2 C12 C11 -2.4(7) . . . . ? 
O3 N2 C12 C11 177.2(5) . . . . ? 
C11 C12 C13 C14 0.7(7) . . . . ? 
N2 C12 C13 C14 -178.1(4) . . . . ? 
C10 C9 C14 C13 -2.1(7) . . . . ? 
C4 C9 C14 C13 177.5(4) . . . . ? 
C12 C13 C14 C9 0.8(7) . . . . ? 
O6 S1 C15 C20 36.0(4) . . . . ? 
O5 S1 C15 C20 168.8(4) . . . . ? 
N1 S1 C15 C20 -78.4(4) . . . . ? 
O6 S1 C15 C16 -145.3(4) . . . . ? 
O5 S1 C15 C16 -12.4(4) . . . . ? 
N1 S1 C15 C16 100.4(4) . . . . ? 
C20 C15 C16 C17 3.3(7) . . . . ? 
S1 C15 C16 C17 -175.5(4) . . . . ? 
C15 C16 C17 C18 -0.5(7) . . . . ? 
C16 C17 C18 C19 -2.6(8) . . . . ? 
C16 C17 C18 C21 177.8(5) . . . . ? 
C17 C18 C19 C20 2.9(8) . . . . ? 
C21 C18 C19 C20 -177.4(5) . . . . ? 
C16 C15 C20 C19 -2.9(7) . . . . ? 
S1 C15 C20 C19 175.8(4) . . . . ? 
C18 C19 C20 C15 -0.3(8) . . . . ? 
C25 N3 C22 C23 -8.0(5) . . . . ? 
S2 N3 C22 C23 132.2(3) . . . . ? 
C25 N3 C22 C26 114.7(4) . . . . ? 
S2 N3 C22 C26 -105.1(4) . . . . ? 
N3 C22 C23 C24 6.1(5) . . . . ? 
C26 C22 C23 C24 -116.2(5) . . . . ? 
C22 C23 C24 C27 -177.7(4) . . . . ? 
C22 C23 C24 C25 -1.9(6) . . . . ? 
C22 N3 C25 C24 7.1(4) . . . . ? 
S2 N3 C25 C24 -131.9(3) . . . . ? 
C22 N3 C25 C30 -115.1(4) . . . . ? 
S2 N3 C25 C30 105.9(4) . . . . ? 
C23 C24 C25 N3 -3.2(5) . . . . ? 
C27 C24 C25 N3 172.8(4) . . . . ? 
C23 C24 C25 C30 117.0(4) . . . . ? 
C27 C24 C25 C30 -66.9(5) . . . . ? 
C28 O8 C27 O7 -12.4(8) . . . . ? 
C28 O8 C27 C24 165.5(5) . . . . ? 
C23 C24 C27 O7 170.1(5) . . . . ? 
C25 C24 C27 O7 -5.3(7) . . . . ? 
C23 C24 C27 O8 -7.8(7) . . . . ? 
C25 C24 C27 O8 176.8(4) . . . . ? 
C27 O8 C28 C29 134.0(8) . . . . ? 
N3 C25 C30 C35 20.1(5) . . . . ? 
C24 C25 C30 C35 -94.5(5) . . . . ? 
N3 C25 C30 C31 -161.5(4) . . . . ? 
C24 C25 C30 C31 83.9(5) . . . . ? 
C35 C30 C31 C32 1.8(6) . . . . ? 
C25 C30 C31 C32 -176.7(4) . . . . ? 
C30 C31 C32 C33 0.1(7) . . . . ? 
C31 C32 C33 C34 -2.2(7) . . . . ? 
C31 C32 C33 N4 177.2(4) . . . . ? 
O9 N4 C33 C34 -2.1(7) . . . . ? 
O10 N4 C33 C34 176.8(5) . . . . ? 
O9 N4 C33 C32 178.4(5) . . . . ? 
O10 N4 C33 C32 -2.7(7) . . . . ? 
C32 C33 C34 C35 2.4(7) . . . . ? 
N4 C33 C34 C35 -177.0(4) . . . . ? 
C33 C34 C35 C30 -0.4(7) . . . . ? 
C31 C30 C35 C34 -1.6(6) . . . . ? 
C25 C30 C35 C34 176.8(4) . . . . ? 
O11 S2 C36 C37 -14.4(4) . . . . ? 
O12 S2 C36 C37 -146.8(4) . . . . ? 
N3 S2 C36 C37 99.0(4) . . . . ? 
O11 S2 C36 C41 166.3(3) . . . . ? 
O12 S2 C36 C41 33.9(4) . . . . ? 
N3 S2 C36 C41 -80.3(4) . . . . ? 
C41 C36 C37 C38 2.8(7) . . . . ? 
S2 C36 C37 C38 -176.5(4) . . . . ? 
C36 C37 C38 C39 -0.5(8) . . . . ? 
C37 C38 C39 C40 -1.1(8) . . . . ? 
C37 C38 C39 C42 177.6(5) . . . . ? 
C38 C39 C40 C41 0.6(8) . . . . ? 
C42 C39 C40 C41 -178.2(5) . . . . ? 
C37 C36 C41 C40 -3.3(7) . . . . ? 
S2 C36 C41 C40 176.0(4) . . . . ? 
C39 C40 C41 C36 1.5(8) . . . . ? 
  
_diffrn_measured_fraction_theta_max    0.924 
_diffrn_reflns_theta_full              28.32 
_diffrn_measured_fraction_theta_full   0.924 
_refine_diff_density_max    0.669 
_refine_diff_density_min   -0.377 
_refine_diff_density_rms    0.057 
  
